# Supplementary material
Source: PubMed Central journal article supplement (PMC6626561)
Supplement: NIHMS1033981-supplement-8.pdf [file NIHMS1033981-supplement-8.pdf]

581 **Supplementary Table 1.** Patient characteristics by units of RBCs transfused

| Variable       | Number of RBC units transfused |                  |                  |                  |
|----------------|--------------------------------|------------------|------------------|------------------|
|                | 0 or 1 unit                    | 2 units          | 3 to 7 units     | ≥ 8 units        |
| N              | 4549                           | 149              | 117              | 32               |
| Age (years)    | 68.0 (61.0-75.0)               | 67.0 (59.0-73.0) | 69.0 (60.0-76.0) | 72.0 (65.5-78.0) |
| Male           | 1948 (42.8)                    | 53 (35.6)        | 66 (56.4)        | 22 (68.8)        |
| Pack-years     | 32.0 (10.0-54.0)               | 40.0 (20.0-60.0) | 40.0 (22.0-60.0) | 47.5 (25.0-73.9) |
| Smoking status |                                |                  |                  |                  |
| Never          | 733 (16.1)                     | 17 (11.4)        | 9 (7.7)          | 3 (9.4)          |
| Former         | 3186 (70.0)                    | 98 (65.8)        | 93 (79.5)        | 24 (75.0)        |
| Current        | 630 (13.8)                     | 34 (22.8)        | 15 (12.8)        | 5 (15.6)         |
| Comorbidities  |                                |                  |                  |                  |
| Pulmonary      | 1348 (29.6)                    | 42 (28.2)        | 43 (36.8)        | 12 (37.5)        |
| Cardiac        | 2460 (54.1)                    | 84 (56.4)        | 70 (59.8)        | 17 (53.1)        |
| Endocrine      | 557 (12.2)                     | 15 (10.1)        | 16 (13.7)        | 7 (21.9)         |

|                          |                   |                  |                  |                  |
|--------------------------|-------------------|------------------|------------------|------------------|
| Renal                    | 91 (2.0)          | 3 (2.0)          | 6 (5.1)          | 5 (15.6)         |
| Preop-Hemoglobin (g/dL)  | 13.1 (12.1-14.0)  | 11.0 (10.1-12.4) | 12.1 (10.6-13.2) | 12.1 (10.9-13.3) |
| SUV <sub>max</sub>       | 6.0 (2.8-11.0)    | 10.4 (5.3-15.6)  | 10.0 (5.0-14.2)  | 11.5 (8.0-15.8)  |
| FEV1 (% predicted)       | 89.7 (77.0-102.0) | 84.0 (73.0-95.0) | 88.0 (73.0-98.0) | 79.0 (70.0-88.5) |
| DLCO (% predicted)       | 80.0 (66.0-94.0)  | 70.0 (57.0-80.0) | 72.0 (58.0-83.0) | 63.0 (52.0-75.0) |
| Neoadjuvant chemotherapy | 805 (17.7)        | 66 (44.3)        | 51 (43.6)        | 12 (37.5)        |
| Neoadjuvant radiation    | 107 (2.4)         | 12 (8.1)         | 17 (14.5)        | 6 (18.8)         |
| ASA classification       |                   |                  |                  |                  |
| 1                        | 12 (0.3)          | 0 (0.0)          | 0 (0.0)          | 0 (0.0)          |
| 2                        | 1232 (27.2)       | 32 (21.6)        | 19 (16.4)        | 6 (18.8)         |
| 3                        | 3140 (69.3)       | 154 (78.6)       | 87 (75.0)        | 25 (78.1)        |
| 4                        | 150 (3.3)         | 3 (2.0)          | 10 (8.6)         | 1 (3.1)          |
| Operation type           |                   |                  |                  |                  |
| Lobectomy                | 3834 (84.3)       | 112 (75.2)       | 93 (79.5)        | 27 (84.4)        |
| Bilobectomy              | 132 (2.9)         | 8 (5.4)          | 3 (2.6)          | 2 (6.2)          |

|                            |             |           |           |           |
|----------------------------|-------------|-----------|-----------|-----------|
| Pneumonectomy              | 177 (3.9)   | 23 (15.4) | 16 (13.7) | 2 (6.2)   |
| Segmentectomy              | 406 (8.9)   | 6 (4.0)   | 5 (4.3)   | 1 (3.1)   |
| VATS                       | 1574 (34.6) | 16 (10.7) | 13 (11.1) | 3 (9.4)   |
| Robot-assisted             | 469 (10.3)  | 4 (2.7)   | 4 (3.4)   | 3 (9.4)   |
| Intrapericardial resection | 70 (1.5)    | 8 (5.4)   | 5 (4.3)   | 1 (3.1)   |
| Chest wall resection       | 96 (2.1)    | 24 (16.1) | 20 (17.1) | 9 (28.1)  |
| Vascular resection         | 29 (0.6)    | 4 (2.7)   | 0 (0.0)   | 4 (12.5)  |
| Pathologic stage           |             |           |           |           |
| IA                         | 1975 (43.4) | 32 (21.5) | 34 (29.1) | 5 (15.6)  |
| IB                         | 899 (19.8)  | 16 (10.7) | 18 (15.4) | 8 (25.0)  |
| IIA                        | 610 (13.4)  | 24 (16.1) | 13 (11.1) | 2 (6.2)   |
| IIB                        | 312 (6.9)   | 33 (22.1) | 30 (25.6) | 8 (25.0)  |
| IIIA                       | 753 (16.6)  | 44 (29.5) | 22 (18.8) | 9 (28.1)  |
| Pathologic subtype         |             |           |           |           |
| Adenocarcinoma             | 3385 (74.4) | 90 (60.4) | 66 (56.4) | 14 (43.8) |

|                                  |            |           |           |           |
|----------------------------------|------------|-----------|-----------|-----------|
| Adenosquamous                    | 73 (1.6)   | 5 (3.4)   | 0 (0.0)   | 2 (6.2)   |
| Invasive mucinous adenocarcinoma | 45 (1.0)   | 2 (1.3)   | 3 (2.6)   | 0 (0.0)   |
| Large cell carcinoma             | 141 (3.1)  | 5 (3.4)   | 10 (8.5)  | 2 (6.2)   |
| Squamous cell carcinoma          | 806 (17.7) | 39 (26.2) | 35 (29.9) | 11 (34.4) |
| Other NSCLC histologic subtype   | 99 (2.2)   | 8 (5.4)   | 3 (2.6)   | 3 (2.6)   |

582

583 Data are no. (%) or median (interquartile range). ASA, American Society of Anesthesiologists physical status classification; CI,  
584 confidence interval; DLCO, lung diffusion capacity of carbon monoxide; FEV1, forced expiratory volume in 1 second; HR, hazard  
585 ratio; NSCLC, non–small cell lung cancer;  $SUV_{max}$ , maximum standardized uptake value; VATS, video-assisted thoracoscopic  
586 surgery.

587

588 **Supplementary Table 2.** Multivariable Cox regression model for overall survival in dose-response analysis

589

| <b>Variable</b> | <b>HR</b> | <b>95% CI</b> | <b>P</b> |
|-----------------|-----------|---------------|----------|
| RBCs transfused |           |               |          |
| 0 or 1 units    | Reference |               |          |
| 2 units         | 1.55      | (1.26-1.91)   | <0.001   |
| 3 to 7 units    | 2.02      | (1.61-2.53)   | <0.001   |
| ≥ 8 units       | 4.29      | (2.91-6.33)   | <0.001   |
| Age (years)     | 1.03      | (1.03-1.04)   | <0.001   |
| Pack-years      | 1.00      | (1.00-1.00)   | 0.001    |
| Male            | 1.21      | (1.10-1.32)   | <0.001   |
| Comorbidities   |           |               |          |
| Pulmonary       | 1.06      | (0.96-1.16)   | 0.270    |
| Cardiac         | 1.07      | (0.98-1.18)   | 0.132    |
| Endocrine       | 1.05      | (0.93-1.19)   | 0.434    |

|                                |           |             |        |
|--------------------------------|-----------|-------------|--------|
| Renal                          | 1.23      | (0.95-1.60) | 0.119  |
| Preoperative hemoglobin (g/dL) | 1.00      | (0.97-1.03) | 0.995  |
| SUV <sub>max</sub>             | 1.00      | (0.99-1.01) | 0.969  |
| FEV1 (% predicted)             | 1.00      | (1.00-1.00) | 0.242  |
| DLCO (% predicted)             | 0.99      | (0.99-0.99) | <0.001 |
| Neoadjuvant chemotherapy       | 1.15      | (1.02-1.30) | 0.026  |
| Neoadjuvant radiation          | 1.93      | (1.51-2.46) | <0.001 |
| ASA Classification             |           |             |        |
| 1                              | Reference |             |        |
| 2                              | 1.14      | (0.37-3.57) | 0.818  |
| 3                              | 1.39      | (0.44-4.35) | 0.570  |
| 4                              | 1.50      | (0.47-4.81) | 0.498  |
| VATS                           | 0.72      | (0.64-0.81) | <0.001 |
| Chest wall resection           | 0.79      | (0.61-1.02) | 0.071  |
| Pathologic stage               |           |             |        |

|                                  |           |             |        |
|----------------------------------|-----------|-------------|--------|
| IA                               | Reference |             |        |
| IB                               | 1.40      | (1.23-1.58) | <0.001 |
| IIA                              | 1.89      | (1.66-2.17) | <0.001 |
| IIB                              | 1.86      | (1.56-2.21) | <0.001 |
| IIIA                             | 3.13      | (2.77-3.54) | <0.001 |
| Pathological subtype             |           |             |        |
| Adenocarcinoma                   | Reference |             |        |
| Adenosquamous                    | 1.28      | (0.97-1.70) | 0.086  |
| Invasive mucinous adenocarcinoma | 0.77      | (0.51-1.17) | 0.219  |
| Large cell carcinoma             | 1.17      | (0.94-1.46) | 0.167  |
| Squamous cell carcinoma          | 1.04      | (0.93-1.16) | 0.522  |
| Other NSCLC histologic subtype   | 1.66      | (1.30-2.11) | <0.001 |

590

591 ASA, American Society of Anesthesiologists physical status classification; CI, confidence interval; DLCO, lung diffusion capacity of

592 carbon monoxide; FEV1, forced expiratory volume in 1 second; HR, hazard ratio; NSCLC, non-small cell lung cancer;  $SUV_{max}$ ,

593 maximum standardized uptake value; VATS, video-assisted thoracoscopic surgery.

594 **Supplementary Table 3.** Multivariable Cox regression model for disease-free survival in dose-response analysis

| <b>Variable</b>  | <b>HR</b> | <b>95% CI</b> | <b>P</b> |
|------------------|-----------|---------------|----------|
| RBC transfusions |           |               |          |
| 0 or 1 units     | Reference |               |          |
| 2-units          | 1.44      | (1.19-1.76)   | <0.0001  |
| 3 to 7 units     | 1.85      | (1.49-2.30)   | <0.0001  |
| ≥8 units         | 3.57      | (2.45-5.21)   | <0.0001  |
| Age (years)      | 1.02      | (1.02-1.03)   | <0.0001  |
| Pack-years       | 1.00      | (1.00-1.00)   | 0.098    |
| Male             | 1.16      | (1.06-1.26)   | 0.001    |
| Comorbidities    |           |               |          |
| Pulmonary        | 0.98      | (0.90-1.07)   | 0.673    |
| Cardiac          | 0.99      | (0.91-1.07)   | 0.745    |
| Endocrine        | 1.02      | (0.90-1.15)   | 0.777    |
| Renal            | 1.15      | (0.90-1.47)   | 0.262    |

|                                |           |             |         |
|--------------------------------|-----------|-------------|---------|
| Preoperative hemoglobin (g/dL) | 1.00      | (0.98-1.03) | 0.814   |
| SUV <sub>max</sub>             | 1.00      | (1.00-1.01) | 0.200   |
| FEV1 (% predicted)             | 1.00      | (0.99-1.00) | 0.022   |
| DLCO (% predicted)             | 0.99      | (0.99-1.00) | <0.0001 |
| Neoadjuvant chemotherapy       | 1.24      | (1.11-1.39) | <0.0001 |
| Neoadjuvant radiation          | 1.75      | (1.39-2.20) | <0.0001 |
| ASA Classification             |           |             |         |
| 1                              | Reference |             |         |
| 2                              | 1.20      | (0.45-3.22) | 0.719   |
| 3                              | 1.49      | (0.56-4.01) | 0.427   |
| 4                              | 1.72      | (0.62-4.72) | 0.296   |
| VATS                           | 0.76      | (0.68-0.84) | <0.0001 |
| Chest wall resection           | 0.68      | (0.53-0.87) | 0.002   |
| Pathologic stage               |           |             |         |
| IA                             | Reference |             |         |

|                                  |           |             |         |
|----------------------------------|-----------|-------------|---------|
| IB                               | 1.48      | (1.32-1.67) | <0.0001 |
| IIA                              | 2.07      | (1.82-2.34) | <0.0001 |
| IIB                              | 2.14      | (1.82-2.52) | <0.0001 |
| IIIA                             | 3.46      | (3.09-3.89) | <0.0001 |
| Pathological subtype             |           |             |         |
| Adenocarcinoma                   | Reference |             |         |
| Adenosquamous                    | 1.16      | (0.89-1.52) | 0.277   |
| Invasive mucinous adenocarcinoma | 0.85      | (0.57-1.25) | 0.405   |
| Large cell carcinoma             | 1.09      | (0.88-1.35) | 0.424   |
| Squamous cell carcinoma          | 0.93      | (0.84-1.03) | 0.180   |
| Other NSCLC histologic subtype   | 1.38      | (1.09-1.75) | <0.0001 |

595

596 ASA, American Society of Anesthesiologists physical status classification; CI, confidence interval; DLCO, lung diffusion capacity of

597 carbon monoxide; FEV1, forced expiratory volume in 1 second; HR, hazard ratio; NSCLC, non–small cell lung cancer;  $SUV_{max}$ ,

598 maximum standardized uptake value; VATS, video-assisted thoracoscopic surgery.

599

600 **Supplementary Table 4.** Multivariable cause-specific Cox regression model for recurrence in dose-response analysis

| <b>Variable</b>                | <b>HR</b> | <b>95% CI</b> | <b>P</b> |
|--------------------------------|-----------|---------------|----------|
| RBC transfusions               |           |               |          |
| 0 or 1 units                   | Reference |               |          |
| 2 units                        | 1.35      | (1.04-1.75)   | 0.023    |
| 3 to 7 units                   | 1.50      | (1.09-2.07)   | 0.013    |
| ≥8 units                       | 1.58      | (0.80-3.10)   | 0.187    |
| Age (years)                    | 1.00      | (1.00-1.01)   | 0.284    |
| Pack-years                     | 1.00      | (1.00-1.00)   | 0.161    |
| Male                           | 1.15      | (1.03-1.29)   | 0.015    |
| Preoperative hemoglobin (g/dL) | 0.99      | (0.95-1.03)   | 0.653    |
| SUV <sub>max</sub>             | 1.01      | (1.00-1.02)   | 0.003    |
| Neoadjuvant chemotherapy       | 1.55      | (1.34-1.78)   | 0.000    |
| Neoadjuvant radiation          | 1.30      | (0.97-1.74)   | 0.074    |
| Chest wall resection           | 0.63      | (0.45-0.88)   | 0.007    |

| Pathologic stage                 |           |             |       |  |
|----------------------------------|-----------|-------------|-------|--|
| IA                               | Reference |             |       |  |
| IB                               | 2.06      | (1.73-2.45) | 0.000 |  |
| IIA                              | 3.55      | (2.99-4.22) | 0.000 |  |
| IIB                              | 3.70      | (2.98-4.60) | 0.000 |  |
| IIIA                             | 5.41      | (4.61-6.36) | 0.000 |  |
| Pathological subtype             |           |             |       |  |
| Adenocarcinoma                   | Reference |             |       |  |
| Adenosquamous                    | 1.25      | (0.87-1.79) | 0.221 |  |
| Invasive mucinous adenocarcinoma | 1.14      | (0.64-2.02) | 0.659 |  |
| Large cell carcinoma             | 1.02      | (0.78-1.35) | 0.875 |  |
| Squamous cell carcinoma          | 0.72      | (0.62-0.84) | 0.000 |  |
| Other NSCLC histologic subtype   | 1.22      | (0.90-1.66) | 0.197 |  |

601

602 CI, confidence interval; HR, hazard ratio; NSCLC, non-small cell lung cancer;  $SUV_{max}$ , maximum standardized uptake value.
